# Supplementary material for: Connexin hemichannels with prostaglandin release in anabolic function of bone to mechanical loading
Source: eLife. 2022 Feb 8;11:e74365. doi: 10.7554/eLife.74365 (PMC8824479; doi:10.7554/eLife.74365)
Supplement: Figure 1—figure supplement 1—source data 1. [file elife-74365-fig1-figsupp1-data1.xlsx]

## Sheet: Sheet1
WT	180.34	207.51	198.09	207.63	217.34	129.63	171.86	212.06	126.51	126.96
R76W	134.38	169.72	200.76	180.68	197.19	160.3	187.7	141.61
Δ130-136	123.31	111.03	117.59	93.49	217.1	184.32	86.27	133.98	91.53	53.67
