# Supplementary material for: Connexin hemichannels with prostaglandin release in anabolic function of bone to mechanical loading
Source: eLife. 2022 Feb 8;11:e74365. doi: 10.7554/eLife.74365 (PMC8824479; doi:10.7554/eLife.74365)
Supplement: Figure 1—figure supplement 2—source data 1. [file elife-74365-fig1-figsupp2-data1.xlsx]

## Sheet: Sheet1
-	+	-	+	-	+	Loaded
WT		R76W		Δ130-136
2.84431	7.22011	3.41089	9.0138	3.09165	3.55172
3.00982	6.89637	2.63451	7.60152	3.57226	3.14513
3.77379	6.89316	3.9559	12.2248	1.89015	2.6652
2.27013	7.80562	3.6	11.0506	2.05764	2.49808
