# Supplementary material for: Connexin hemichannels with prostaglandin release in anabolic function of bone to mechanical loading
Source: eLife. 2022 Feb 8;11:e74365. doi: 10.7554/eLife.74365 (PMC8824479; doi:10.7554/eLife.74365)
Supplement: Figure 1—figure supplement 3—source data 1. [file elife-74365-fig1-figsupp3-data1.xlsx]

## Sheet: Sheet1
WT	25.1	26.5	27.2	25.3	26.5	27.4	23.8	25.6	25.7	26.5	27.2	25.3	26.5	27.4	23.8	25.6	25.7	23.25	25.1	23.3	26.7	27
R76W	27.25	25	26.85	26.3	24.8	24.2	26.1	26	24.8	27.2	25.7	24.9	26.2	25.6	25.6	24.1	24.4	26.1	26.3	24	26.2	26.3
Δ130-136	27.75	25.65	25.1	27	26.6	24.75	26.6	26.45	24.65	25.1	24.9	24.75	26.6	26.45	24.65	25.1	24.9	24	25.4	25.5	27.75	25.65
