# Supplementary material for: Connexin hemichannels with prostaglandin release in anabolic function of bone to mechanical loading
Source: eLife. 2022 Feb 8;11:e74365. doi: 10.7554/eLife.74365 (PMC8824479; doi:10.7554/eLife.74365)
Supplement: Figure 1—source data 1. [file elife-74365-fig1-data1.xlsx]

## Sheet: Sheet1
	BV/TV	Tb.N	Tb.Sp	Tb.Th	BMD	SMI
WT-Control	0.0511	4.1977	0.2335	0.0307	982.529	2.7906
	0.078	4.4996	0.2139	0.0349	1005.83	2.4125
	0.0848	4.6729	0.2028	0.0323	995.997	2.0897
	0.0776	4.5449	0.2088	0.0354	988.21	2.5613
	0.0658	4.3253	0.2228	0.033	1005.89	2.6197
	0.0992	4.3602	0.2196	0.0368	1028.49	2.1208
	0.0699	4.399	0.2224	0.0362	1045.76	2.5993
	0.0901	4.3225	0.2224	0.0383	1044.22	2.2729
WT-Loading	0.0764	4.7025	0.2054	0.0371	999.317	2.6762
	0.0744	4.3503	0.2226	0.0406	1000.91	2.7342
	0.1149	4.97	0.1914	0.0433	994.466	2.3964
	0.0785	4.5218	0.2101	0.0421	1002.06	2.7284
	0.0816	4.5149	0.2144	0.044	993.381	2.7983
	0.104	4.5969	0.2044	0.0404	1008.57	2.1874
	0.1073	4.4908	0.2047	0.0464	1040.5	2.3472
	0.0994	3.6259	0.2672	0.0468	1031.73	2.9372
R76W-Control	0.0456	4.241	0.2307	0.0333	1019.55	2.9232
	0.0575	4.3262	0.2263	0.0312	1006.98	2.5488
	0.075	4.4279	0.218	0.0338	978.253	2.475
	0.1458	5.1243	0.1809	0.0382	1008.83	1.4501
	0.096	4.6888	0.2042	0.037	1006.66	2.2209
	0.0688	4.1164	0.2351	0.047	1059.79	2.9882
	0.0679	4.4442	0.2154	0.0317	1031.47	2.4949
R76W-Loaidng	0.0664	4.3864	0.2204	0.0488	1008	3.6779
	0.0972	4.5371	0.2078	0.0456	1014	2.7242
	0.0693	4.3838	0.218	0.0377	969.7	2.682
	0.1323	5.0205	0.1893	0.0362	1012.27	1.3716
	0.1389	4.5592	0.2051	0.0513	1024.34	2.2541
	0.103	3.9322	0.2409	0.0577	1045.76	2.9324
	0.094	4.4885	0.2144	0.0477	1042.81	2.7621
Δ130-136 -Control	0.088	3.5342	0.2684	0.0444	988.402	2.2883
	0.1253	4.1432	0.2315	0.0505	1000.66	1.868
	0.0466	3.0577	0.3172	0.0394	999.445	2.7331
	0.0854	3.4414	0.2791	0.0485	1009.53	2.38
	0.0478	2.97	0.3206	0.0493	1000.4	3.2025
	0.0885	3.8821	0.2447	0.0533	1022.61	2.634
	0.1163	3.9533	0.2285	0.048	1037.69	1.9997
	0.1138	3.9195	0.2372	0.0463	1033.01	1.8262
	0.1007	3.6016	0.2606	0.0562	1004.63	2.5344
	0.1445	4.103	0.2198	0.0497	1031.6	1.8164
Δ130-136 -Loading	0.0869	2.9639	0.3245	0.0573	1003.72	2.5395
	0.0925	3.4174	0.2753	0.0528	981.955	2.3628
	0.0513	2.95	0.3293	0.053	989.487	2.835
	0.0802	3.1277	0.3022	0.0555	982.721	2.3619
	0.0681	3.0057	0.3169	0.0648	987.636	3.062
	0.1015	3.3069	0.2821	0.0542	1003.59	2.2208
	0.1232	3.3065	0.2825	0.0605	1022.05	1.9852
	0.1	3.5295	0.2761	0.0544	1022.12	2.1012
	0.0743	3.2326	0.299	0.0489	1007.58	2.3797
	0.1936	4.3876	0.2035	0.0586	1003.67	1.4109
