# Supplementary material for: Connexin hemichannels with prostaglandin release in anabolic function of bone to mechanical loading
Source: eLife. 2022 Feb 8;11:e74365. doi: 10.7554/eLife.74365 (PMC8824479; doi:10.7554/eLife.74365)
Supplement: Figure 2—source data 1. [file elife-74365-fig2-data1.xlsx]

## Sheet: Sheet1
	T.Ar	B.Ar	B.Ar/T.Ar	M.Ar	Ct.Th	BMD	pMOI
WT-Control	1.16176	0.701176	60.3548	0.46058	0.195119	1215.89	0.186303
	1.00304	0.605732	60.3898	0.397305	0.181711	1218.83	0.140793
	0.965437	0.607907	62.9671	0.35753	0.188214	1202.42	0.133309
	1.07264	0.633307	59.0418	0.439336	0.181437	1211.68	0.158892
	1.00376	0.623384	62.1049	0.380375	0.187581	1218.57	0.144517
	1.04068	0.661774	63.5906	0.378904	0.201099	1234.27	0.157224
	0.966737	0.582623	60.2669	0.384115	0.180805	1271.19	0.130762
	0.965144	0.614092	63.627	0.351052	0.185705	1258.76	0.132537
WT-Loading	1.11596	0.713633	63.9481	0.402323	0.198	1206.32	0.18075
	1.02966	0.643616	62.5079	0.386039	0.19508	1231.34	0.153782
	1.04826	0.702513	67.0168	0.34575	0.189797	1181.74	0.160201
	1.10433	0.659051	59.6788	0.44528	0.187685	1207.98	0.168342
	1.08976	0.705136	64.7058	0.384621	0.196069	1208.81	0.173484
	1.04765	0.684152	65.3033	0.363502	0.202754	1222.66	0.158045
	1.03046	0.671764	65.1908	0.358694	0.202172	1229.48	0.147245
	0.97977	0.674108	68.8027	0.305662	0.187156	1254.21	0.139758
R76W-Control	0.92123	0.570689	61.9485	0.350541	0.182054	1241.81	0.121338
	0.969415	0.609583	62.8815	0.359832	0.193544	1233.76	0.134473
	1.08419	0.625988	57.7379	0.458202	0.177456	1226.49	0.160131
	1.30694	0.798331	61.084	0.508609	0.200356	1213.02	0.249275
	0.997828	0.620951	62.2303	0.376877	0.188006	1227.44	0.139455
	1.00679	0.611293	60.7167	0.395502	0.183655	1267.98	0.139979
	1.02213	0.62677	61.32	0.395361	0.18421	1270.55	0.144977
R76W-Loaidng	0.92463	0.581069	62.8434	0.343561	0.196843	1240.66	0.153292
	1.02573	0.679777	66.2727	0.34595	0.201694	1222.02	0.151848
	1.09126	0.670235	61.4182	0.421029	0.194982	1226.87	0.166039
	1.3125	0.821005	62.5525	0.4915	0.202042	1210.21	0.249652
	0.99811	0.674284	67.5561	0.323826	0.185619	1209.7	0.144897
	1.04619	0.666799	63.736	0.37939	0.191955	1260.17	0.155548
	1.05191	0.682544	64.8859	0.369371	0.188105	1247.93	0.158777
Δ130-136 -Control	1.41416	0.860264	60.8321	0.553897	0.214398	1136.49	0.278549
	1.7316	1.06514	61.5116	0.666466	0.223116	1137.32	0.407021
	1.26907	0.772545	60.8751	0.496521	0.2034	1151.61	0.221863
	1.51126	0.88871	58.8058	0.622553	0.201952	1143.19	0.310505
	1.36578	0.797177	58.3679	0.568602	0.18743	1134.76	0.247171
	1.52383	0.869367	57.0514	0.654464	0.194199	1135.98	0.299101
	1.74415	1.01156	57.9971	0.732594	0.185796	1150.3	0.39592
	1.86233	1.05311	56.5479	0.809221	0.185815	1153.32	0.447892
	1.69606	0.981673	57.8796	0.714389	0.192336	1134.67	0.369307
	1.73954	1.085	62.3728	0.65454	0.196565	1164.14	0.412145
Δ130-136 -Loading	1.44658	0.866803	59.9209	0.579775	0.215894	1143.7	0.280463
	1.73698	0.998458	57.4823	0.738524	0.207981	1123.53	0.393509
	1.32255	0.771017	58.2977	0.551533	0.188084	1140.25	0.22852
	1.53668	0.845066	54.9931	0.691612	0.190658	1134.7	0.293214
	1.4166	0.867418	61.2325	0.549179	0.179961	1130.49	0.271617
	1.5704	0.89122	56.7512	0.679179	0.188138	1128.64	0.321355
	1.87744	1.07928	57.4867	0.798164	0.176993	1140.7	0.468821
	1.86596	1.02661	55.0179	0.839347	0.186915	1136.79	0.440692
	1.75465	0.976355	55.6439	0.778295	0.200014	1143.71	0.383673
	1.76689	1.0634	60.1847	0.703492	0.208365	1162.8	0.404327
