# Supplementary material for: Connexin hemichannels with prostaglandin release in anabolic function of bone to mechanical loading
Source: eLife. 2022 Feb 8;11:e74365. doi: 10.7554/eLife.74365 (PMC8824479; doi:10.7554/eLife.74365)
Supplement: Figure 3—source data 1. [file elife-74365-fig3-data1.xlsx]

## Sheet: Sheet1
	Periosteal					Endosteal
	MAR	MS/BS	BFR/BS			MAR	MS/BS	BFR/BS
WT-Control	0.116667	26.6501	0.0310918		WT-Control	0.533333	37.715	0.201147
	0.0833333	20.5999	0.0171666			0.366667	37.6289	0.0456901
	0.1	33.9552	0.0339552			0.2	22.845	0.145157
	0.333333	20.0557	0.0668524			0.258333	46.2106	0.119377
WT-Loading	0.429	65.2509	0.279926		WT-Loading	1.20417	54.7062	0.658754
	0.513833	40.4704	0.20795			0.558333	45.5882	0.662364
	0.8	63.1841	0.505473			1.04167	63.587	0.753043
	0.45	47.2068	0.212431			0.594167	70.9293	0.421438
R76W-Control	0.233333	19.8267	0.0462624		R76W-Control	0.283333	23.9055	0.0677322
	0.166667	29.0474	0.0484123			0.25	30.7882	0.0769704
	0.0833333	33.7059	0.0280883			0.5	43.5644	0.217822
	0.348333	43.8458	0.152729			0.13	28.9926	0.0386568
R76W-Loading	0.406667	58.0423	0.284407		R76W-Loading	0.616667	68.184	0.420468
	0.7725	60.3159	0.46594			0.776667	55.8354	0.433655
	0.5	54.2626	0.276739			1.08167	61.2958	0.663017
	1.04167	49.4812	0.515429			0.5	41.2291	0.206145
WT-Control	0.7875	53.7202	0.423047		WT-Control	0.358333	28.2195	0.10112
	0.696417	66.6915	0.464451			0.208333	22.6472	0.0471817
	0.958333	59.594	0.546278			0.25	39.6501	0.0991252
	0.5	39.9603	0.199802			0.194167	40.8032	0.0792262
Δ130-136 -Loading	1.25	90.7288	1.13411		Δ130-136 -Loading	0.458333	45.3636	0.241939
	1.24167	74.7151	0.927712			0.355833	25.8337	0.0919251
	1.86967	81.4476	1.5228			0.45	45.5882	0.205147
	1.125	60.3769	0.67924			0.151667	45.8305	0.0840226
