# Supplementary material for: Connexin hemichannels with prostaglandin release in anabolic function of bone to mechanical loading
Source: eLife. 2022 Feb 8;11:e74365. doi: 10.7554/eLife.74365 (PMC8824479; doi:10.7554/eLife.74365)
Supplement: Figure 4—figure supplement 1—source data 1. [file elife-74365-fig4-figsupp1-data1.xlsx]

## Sheet: Sheet1
					COX-2+ Osteocytes (#/mm2)
	Control						Loading
WT	121.137	134.676	111.395	95.3521			249.774	211.055	188.977	140.577
R76W	184.589	174.409	214.876	180.468	138.882		281.294	241.243	319.361	214.876	226.36
Δ130-136	62.4604	24.0427	81.9226	56.6155	77.1551	68.5793	41.9921	24.9561	69.2635	105.689	110.315	69.5576
				Sost+ Osteocytes (#/mm2)
	Control					Loading
WT	1134.91	768.64	616.667	703.73		491.036	493.588	220.264	528.048
R76W	623.529	647.619	783.019	427.45		441.558	422.222	331.35	266.89
Δ130-136	608.333	400	569.231	666.667	551.02	330.189	587.912	591.667	614.458	491.685
