# Supplementary material for: Connexin hemichannels with prostaglandin release in anabolic function of bone to mechanical loading
Source: eLife. 2022 Feb 8;11:e74365. doi: 10.7554/eLife.74365 (PMC8824479; doi:10.7554/eLife.74365)
Supplement: Figure 4—source data 1. [file elife-74365-fig4-data1.xlsx]

## Sheet: Sheet1
	Control								Loading
WT	2.26031	1.75083	2.06145	3.73393	1.06065	1.98054	1.97851	2.51281	5.70385	2.98752	1.91161	4.03625	1.794	3.68782	3.94797	5.42849
R76W	2.56827	3.84225	2.24268	2.38644	3.16613	2.5699	1.95707	2.08225	4.12327	5.20953	3.65231	6.23705	3.8649	4.16634	1.71353	3.51721
Δ130-136	1.3602	1.56605	1.50729	0.996807	2.57466	2.40485			1.47214	1.73237	1.36549	0.630531	2.76158	1.57676
