# Supplementary material for: Connexin hemichannels with prostaglandin release in anabolic function of bone to mechanical loading
Source: eLife. 2022 Feb 8;11:e74365. doi: 10.7554/eLife.74365 (PMC8824479; doi:10.7554/eLife.74365)
Supplement: Figure 4—source data 2. [file elife-74365-fig4-data2.xlsx]

## Sheet: Sheet1
					COX-2+ Osteocytes (%)
	Control						Loading
WT	22.6415	22.0339	20	13.6364			38.0952	35	29.8507	22.3684
R76W	24.5614	24.5614	31.7073	27.7778	16.1765		40	36.2319	41.5584	41.2698	28.7879
Δ130-136	18.4211	5.76923	17.0732	17.5439	20.7547	18.3673	11.6279	7.69231	23.5294	27.2727	23.8095	18.4211
				Sost+ Osteocytes (%)
	Control					Loading
WT	74.6269	72.2222	71.8447	81.25		47.6636	49.3213	44.4444	53.8462
R76W	72.6027	80.9524	64.5161	54.0984		46.5753	52.2936	49.2308	25.3012
Δ130-136	83.1461	65.1163	68.5185	67.3077	66.6667	82.3529	72.2973	73.4694	65.3846	60.177
					N.Ob/BS
	Control						Loading
WT	36.0206	25.9516	29.7203	33.8409	28.0702	26.0417	43.2526	35.0877	30	41.5282	41.7391	33.2226
R76W	29.5139	32.7022	20	29.5139	29.8246	26.3158	36.3322	41.7205	29.4627	32.5901	35.2113	31.5236
Δ130-136	17.3611	30.8748	29.2599	30.662	25.1256	24.4755	18.9003	31.5956	27	31	31.6667	27.8746
				N.Oc/BS
	Control					Loading
WT	1.45033	3.47705	1.0985	2.72134	2.16528	3.78583	2.693	1.12903	2.52936	1.01695
R76W	1.56713	3.04278	2.38313	2.98452		1.06026	2.36531	1.3767	3.1746
Δ130-136	3.13769	4.07008	7.287	4.24041	3.70165	6.4707	5.25394	7.19027	6.79916	6.75453
				Oc.S/BS
	Control					Loading
WT	4.78608	6.71071	6.97547	6.58563	3.60881	8.6353	4.93716	2.46774	6.50407	1.45763
R76W	2.19398	5.477	4.76627	3.17105		2.17353	5.86071	2.32318	3.7037
Δ130-136	5.05722	7.64466	6.83997	3.99778	10.2765	10.9632	9.66725	9.83264	11.7792	9.16298
