# Supplementary material for: Connexin hemichannels with prostaglandin release in anabolic function of bone to mechanical loading
Source: eLife. 2022 Feb 8;11:e74365. doi: 10.7554/eLife.74365 (PMC8824479; doi:10.7554/eLife.74365)
Supplement: Figure 4—source data 3. [file elife-74365-fig4-data3.xlsx]

## Sheet: Sheet1
	Sost	Bglap	Dmp1	Runx2
	0.736698	2.71823	1.54818	2.79053
	0.589942	4.22319	2.18981	8.72129
WT	0.15605	4.74871	5.57665	8.62303
		6.30515	3.62246	8.78829
				1.01471
	0.275001	4.92569	1.61977	2.47171
	0.473207	3.53898	2.73422	5.76728
	0.64513	2.77342	3.64448	2.33236
R76W		4.66439	4.37889	3.18578
			4.1061	3.20808
			1.33704	2.59795
	0.950496	1.0196	0.736698	0.333434
	1.1606	2.96083	1.79213	4.9217
Δ130-136	1.3825	2.12432	2.37081	0.909628
		1.97019	2.22695	1.6192
		2.01873	2.04252	1.24687
			0.773278	0.70171
