# Supplementary material for: Connexin hemichannels with prostaglandin release in anabolic function of bone to mechanical loading
Source: eLife. 2022 Feb 8;11:e74365. doi: 10.7554/eLife.74365 (PMC8824479; doi:10.7554/eLife.74365)
Supplement: Figure 5—figure supplement 1—source data 2. [file elife-74365-fig5-figsupp1-data2.xlsx]

## Sheet: Sheet1
Basal	Control	Vehicle	E2 Ab	M1 Ab
2.54957	27.5127	33.5815	11.541	9.34267
3.8402	36.2053	41.706	7.3917	10.4775
3.39693	35.1147	28.76	8.71337	7.869
3.68132	31.9039	32.7396	7.56573	11.1167
-	+	-	+	Loaded
IgG		M1
2.29912	9.12149	2.68342	2.62
2.7821	9.69309	1.78996	1.38605
1.8953	8.34529	2.6309	2.59644
