# Supplementary material for: Connexin hemichannels with prostaglandin release in anabolic function of bone to mechanical loading
Source: eLife. 2022 Feb 8;11:e74365. doi: 10.7554/eLife.74365 (PMC8824479; doi:10.7554/eLife.74365)
Supplement: Figure 5—figure supplement 2—source data 1. [file elife-74365-fig5-figsupp2-data1.xlsx]

## Sheet: Sheet1
	Vehicle																		Loading
0	24.8	24	27.2	24.7	23.5	25.7	27.3	27.2	24.4	24.8	25.8	26.9	25	26.4	26.6	24.3	23.8	23.7	24.8	24.2	27.4	24.6	23.5	25.3	27.3	27.3	24.6	24.8	25.9	26.8	24.7	26.4	26.5	24.2	25.1	26.4
7	24.2	22.9	26	24	23.1	25.2	26.3	26.3	24.1	24.6	25.5	26.9	24.6	25.4	25.4	24	23.1	22.6	24.1	22.8	26.5	23.9	22.4	24.1	26.6	26.2	24.2	23	25	27	24	25.5	25.6	23.7	24.3	26.1
14	24	23.6	25.1	24.5	23.3	24.8	26.2	26.1	24.1	24.3	24.9	26.3	24.3	25.9	25	24.6	22.9	22.6	24	22.6	26.8	24.2	22.1	23.4	26.1	26.4	23.8	22.7	25.3	27	24.3	25.1	25.2	23.7	24.2	25.8
