# Supplementary material for: Connexin hemichannels with prostaglandin release in anabolic function of bone to mechanical loading
Source: eLife. 2022 Feb 8;11:e74365. doi: 10.7554/eLife.74365 (PMC8824479; doi:10.7554/eLife.74365)
Supplement: Figure 5—source data 1. [file elife-74365-fig5-data1.xlsx]

## Sheet: Sheet1
	BV/TV	Tb.N	Tb.Sp	Tb.Th	BMD	SMI	T.Ar	B.Ar	B.Ar/T.Ar	M.Ar	Ct.Th	BMD	pMOI
Vehicle-Control	15.3459	2.9652	0.186111	0.0517535	0.190157	1.96843	0.984191	0.671758	66.0289	0.345611	0.215658	1.26776	0.133007
	13.746	2.36503	0.203972	0.0581218	0.177606	2.22723	1.11069	0.750837	67.601	0.359852	0.234331	1.28686	0.12573
	15.1355	2.98599	0.171945	0.0506885	0.207144	2.08318	0.985121	0.611751	62.0991	0.37337	0.196191	1.28948	0.132348
	9.06539	1.94332	0.212697	0.0466489	0.134883	2.23472	1.01648	0.656135	64.5499	0.360343	0.209714	1.30499	0.132348
	8.9168	1.86214	0.220754	0.0478846	0.117319	2.30472	0.996897	0.655218	65.7257	0.341679	0.214495	1.32946	0.142323
	10.4664	2.04404	0.218794	0.0512043	0.148345	2.15603	0.92661	0.593551	64.0562	0.333059	0.20043	1.28533	0.147053
	15.192	2.87591	0.196227	0.0528252	0.200473	1.92183	0.971612	0.621751	63.9916	0.372558	0.204954	1.2943	0.148211
Vehicle-Loading	18.3031	3.29196	0.171148	0.0555994	0.238189	1.9474	0.993187	0.668483	67.3069	0.324704	0.217854	1.2912	0.143054
	16.047	2.67964	0.208732	0.0598851	0.201887	1.92307	1.11818	0.762746	68.2131	0.355436	0.239085	1.2807	0.13456
	18.0147	3.1257	0.169897	0.0576341	0.236397	1.96125	1.00843	0.624068	61.8854	0.384358	0.208044	1.30017	0.142056
	11.4886	2.19757	0.201131	0.0522784	0.160313	2.29156	1.00086	0.65807	65.7501	0.342795	0.216653	1.3168	0.142056
	10.6124	2.04776	0.21427	0.0518243	0.152076	2.30287	0.981425	0.657592	67.0038	0.323832	0.22087	1.29357	0.146012
	10.2214	1.90171	0.212219	0.0537487	0.150779	2.3228	0.939013	0.614021	65.39	0.324992	0.207606	1.27867	0.170936
	15.5783	2.92742	0.194492	0.0532152	0.206174	1.86629	0.998744	0.646591	64.7404	0.352153	0.211184	1.30451	0.151154
M1-Control	18.1307	3.40415	0.175558	0.0532604	0.228614	1.79236	0.917288	0.647277	70.5642	0.270011	0.228512	1.25783	0.180463
	12.2984	2.63381	0.190251	0.0466943	0.160711	2.03727	1.01681	0.645185	63.4519	0.371624	0.206549	1.2817	0.117137
	13.0633	2.93161	0.178248	0.0445602	0.175454	1.93761	0.964948	0.614427	63.6747	0.350521	0.201947	1.24716	0.134034
	14.0454	3.08523	0.18087	0.0455245	0.173809	1.88879	1.02736	0.61882	60.6473	0.401539	0.194184	1.24716	0.146631
	11.006	2.45017	0.191266	0.0449194	0.154012	2.11401	1.01056	0.612418	60.6015	0.398147	0.193385	1.28503	0.143056
	12.3574	2.4509	0.194022	0.0504201	0.175377	2.21104	1.01531	0.657358	64.7449	0.357947	0.212692	1.30647	0.122291
	9.74306	2.11442	0.212426	0.0460792	0.14889	2.20141	1.03084	0.629703	61.0865	0.401136	0.197084	1.28949	0.134455
M1-Loaidng	19.35	3.34834	0.169905	0.0577898	0.248133	1.85369	0.959722	0.651568	67.8914	0.308154	0.220864	1.29801	0.183902
	14.8151	2.87628	0.185695	0.0515078	0.195607	1.95781	1.06214	0.653415	61.5189	0.408722	0.202368	1.27249	0.129797
	14.1441	2.87183	0.185114	0.0492511	0.190951	1.97383	0.99865	0.638632	63.9495	0.360018	0.207851	1.26852	0.141513
	14.7648	3.20649	0.183985	0.0460466	0.185188	1.80737	1.02036	0.621082	60.4545	0.406273	0.19155	1.26852	0.143567
	12.0779	2.51133	0.186195	0.0480936	0.166765	2.16312	1.02699	0.611564	59.5495	0.415421	0.189967	1.27244	0.138458
	13.861	2.51224	0.196774	0.0551737	0.188566	2.1811	1.08841	0.699431	64.2618	0.388977	0.216155	1.3032	0.126711
	9.17119	1.77035	0.211762	0.0518044	0.137058	2.49767	1.03869	0.620845	59.7721	0.417842	0.190797	1.27166	0.142723
