# Supplementary material for: Connexin hemichannels with prostaglandin release in anabolic function of bone to mechanical loading
Source: eLife. 2022 Feb 8;11:e74365. doi: 10.7554/eLife.74365 (PMC8824479; doi:10.7554/eLife.74365)
Supplement: Figure 5—source data 2. [file elife-74365-fig5-data2.xlsx]

## Sheet: Sheet1
	Elastic Modulus	Stiffness	Ultimate Stress	Ultimate Force
Vehicle-Control	12.2741	80.55	238.578	16.1867
	11.4057	106.19	221.456	18.8631
	18.4534	92.133	275.328	14.6169
	12.4032	73.163	255.361	15.5948
	9.50842	51.765	254.333	14.2695
	7.82028	59.881	196.634	14.6556
	11.1185	90.693	218.748	17.2933
	14.5821	107.74	221.197	15.7492
Vehicle-Loading	12.8616	72.71	269.313	15.8651
	13.5735	105.25	213.28	15.775
	17.8722	99.363	255.142	14.4368
	13.3042	90.611	241.433	16.2253
	10.4462	71.111	221.076	15.003
	13.3254	93.873	231.152	16.1095
	14.3733	124.98	220.51	17.8723
	16.0467	112.51	252.39	17.036
M1-Control	13.2634	65.752	269.155	14.1023
	5.96738	89.862	136.268	16.7529
	15.2174	96.432	245.175	15.1831
	14.3034	85.43	231.36	13.7162
	14.2503	104.74	225.678	16.0709
	11.5093	74.073	236.789	15.4533
	7.78685	98.813	141.874	15.4404
M1-Loaidng	9.55946	115.8	185.486	18.7087
	9.2972	92.511	178.183	18.2455
	10.933	81.824	184.336	13.6005
	13.0976	77.758	241.379	14.4368
	8.98611	92.494	150.738	14.1666
	12.6187	78.351	240.535	15.2088
	8.69091	86.424	173.523	15.6849
