# Supplementary material for: Connexin hemichannels with prostaglandin release in anabolic function of bone to mechanical loading
Source: eLife. 2022 Feb 8;11:e74365. doi: 10.7554/eLife.74365 (PMC8824479; doi:10.7554/eLife.74365)
Supplement: Figure 6—source data 1. [file elife-74365-fig6-data1.xlsx]

## Sheet: Sheet1
	Periosteal					Endosteal
	MAR	MS/BS	BFR/BS			MAR	MS/BS	BFR/BS
Vehicle-Control	0.370667	50.9278	0.188772		Vehicle-Control	0.275	52.7843	0.145157
	0.275	40.031	0.110085			0.433333	37.1287	0.160891
	0.25	21.5308	0.053827			0.258333	46.8292	0.120975
	0.208333	31.7677	0.0661828			0.197917	55.6593	0.110159
	0.29625	19.817	0.0587077			0.25	48.6039	0.12151
	0.388917	33.9769	0.132142			0.416667	48.6139	0.202558
Vehicle-Loading	0.8475	61.153	0.518271		Vehicle-Loading	0.933333	80.6832	0.753043
	0.444417	52.2132	0.232044			0.833333	65.4582	0.545485
	0.333333	48.5991	0.161997			1.26667	84.7885	1.07399
	0.635958	60.1504	0.382531			1.23	83.457	1.02652
	0.45	47.6426	0.214392			0.4725	65.7665	0.310747
	0.876667	59.0024	0.566423			0.765833	60.9369	0.466675
M1-Control	0.25	33.0528	0.0826321		M1-Control	0.291667	50.119	0.146181
	0.383833	75.2849	0.288968			0.333333	41.013	0.13671
	0.693167	62.5603	0.433647			0.411458	47.5323	0.195576
	0.233333	23.5729	0.0550033			0.303	55.7087	0.168797
	0.194417	24.92	0.0484486			0.431333	57.207	0.246753
	0.316667	30.0119	0.0950378			0.208333	38.7505	0.0807302
M1-Loading	0.458333	59.9538	0.274788		M1-Loading	0.541667	56.8862	0.308134
	0.529125	96.2257	0.509154			0.739167	43.9063	0.324541
	1.24333	82.7374	1.0287			0.5	43.7179	0.218589
	0.9345	63.5205	0.593599			0.384583	66.7454	0.256692
	0.475	53.369	0.231266			0.398808	69.0438	0.275353
	0.6625	67.965	0.450268			0.166667	36.1056	0.060176
