# Supplementary material for: Connexin hemichannels with prostaglandin release in anabolic function of bone to mechanical loading
Source: eLife. 2022 Feb 8;11:e74365. doi: 10.7554/eLife.74365 (PMC8824479; doi:10.7554/eLife.74365)
Supplement: Figure 7—figure supplement 1—source data 1. [file elife-74365-fig7-figsupp1-data1.xlsx]

## Sheet: Sheet1
								COX-2+ Osteocytes (#/mm2)
	Control									Loading
Vehicle	236.559	336.538	95.2381	159.652	165.138	206.313	248.177	279.574	324.13	254.777	402.439	327.273	217.177	300	532.43	417.229	445.856	290.686
M1	226.804	350	181.406	127.66	223.301	126.05	168.15	186.092		144.181	155.119	233.844	222.458	231.481	133.333	126.582	137.12
							Sost+ Osteocytes (#/mm2)
	Control								Loading
Vehicle	705.357	643.127	587.786	666.667	752.212	444.353	361.121	409.24	405.594	462.5	421.053	491.667	528.455	239.456	275.133	248.398
M1	704	769.231	566.667	589.147	525	750	722.222	411.696	641.667	656.489	519.685	562.5	491.803	709.677	500	403.137
					β-catenin+ Osteocytes (#/mm2)
	Control						Loading
Vehicle	22.0779	23.5602	21.6285	11.6883	16.5816	9.06736	48.6842	56.051	40.8685	42.0499	54.0184	41.6667
M1	15.5642	15.6454	22.339	11.5237	12.87		14.0845	16.5394	22.2805	16.8394	10.5402
