# Supplementary material for: Connexin hemichannels with prostaglandin release in anabolic function of bone to mechanical loading
Source: eLife. 2022 Feb 8;11:e74365. doi: 10.7554/eLife.74365 (PMC8824479; doi:10.7554/eLife.74365)
Supplement: Figure 7—source data 1. [file elife-74365-fig7-data1.xlsx]

## Sheet: Sheet1
	Control								Loading
Vehicle	0.91768	2.18001	4.71132	1.86619	1.28016	3.27888	2.46222	2	1.4178	2.48053	4.48945	6.89238	2.20513	4.08607	4.15243	4.30846
M1	1.24888	1.8338	1.05381	1.87509	1.4782	3.33514	1.66543	1.19776	0.890884	0.873455	0.845097	1.12319	3.47809	1.66002	2.0041	0.178293
