# Supplementary material for: Connexin hemichannels with prostaglandin release in anabolic function of bone to mechanical loading
Source: eLife. 2022 Feb 8;11:e74365. doi: 10.7554/eLife.74365 (PMC8824479; doi:10.7554/eLife.74365)
Supplement: Figure 7—source data 2. [file elife-74365-fig7-data2.xlsx]

## Sheet: Sheet1
								COX-2+ Osteocytes (%)
	Control									loading
Vehicle	26.506	31.1111	17.8571	20.1835	24.3243	30.303	35.5556	39.0244	26.7606	23.2558	54.0984	49.3151	40	38.0952	42.3077	74.5098	62.0253	47.4576
M1	25.5814	32.4074	22.5352	17.6471	23.4694	11.1111	21.519	23.4568		24.5614	28.3019	25.8824	27.6316	25.7732	18.9189	20	24.1379
								Sost+ Osteocytes (%)
	Control									loading
Vehicle	71.8182	82.2581	75.4902	65.7895	86.0759	62.3188	63.3333	58.75		61.0526	49.3333	47.619	49.1667	63.7255	42.3077	40	38.4615
M1	71.5447	65.0407	85	73.0769	77.7778	80.6452	72.2222	63.9344		72.6415	74.7826	69.4737	70	68.9655	69.6203	70.2703	66.2338
					β-catenin+ Osteoblasts (%)
	Control						loading
Vehicle	17.8947	15.1261	23.9437	9	12.5	8.04598	43.5294	41.5094	29.0909	38.5542	44.5652	37.6471
M1	11.1111	10.7143	17.7083	10.9756	9.80392		9.73451	14.1304	19.7674	12.381	7.27273
					N.Ob/BS
	Control					Loading
Vehicle	27.7778	31.3589	34.8432	31.0881	22.7273	38.3944	33.0435	45.5342	42.5197	29.1595
M1	29.4627	31.3589	27.3038	27.1186	28.0702	31.4685	29.7203	36.5854	29.4118	27.972
						Oc.S/BS
	Control							Loading
Vehicle	5.35505	7.09794	7.28422	2.19505	7.24201	8.46388		4.71585	3.16767	7.06643	6.04048	12.9246	10.1033
M1	8.39168	5.32519	4.3717	5.24666	6.45474	13.0555	2.62484	13.3291	6.9772	8.31468	12.0127	12.6184	12.8416	5.31626
						N.Oc/BS
	Control							Loading
Vehicle	2.76802	3.73015	3.52295	1.14979	4.41192	4.73136		1.52124	2.51229	3.39019	2.89172	7.81335	5.32311
M1	3.80972	3.15723	2.26123	3.03094	3.34052	6.07482	1.70721	4.55605	3.45406	3.83754	5.84174	6.52494	6.07375	2.92937
