# Supplementary material for: Connexin hemichannels with prostaglandin release in anabolic function of bone to mechanical loading
Source: eLife. 2022 Feb 8;11:e74365. doi: 10.7554/eLife.74365 (PMC8824479; doi:10.7554/eLife.74365)
Supplement: Figure 7—source data 3. [file elife-74365-fig7-data3.xlsx]

## Sheet: Sheet1
	COX-2	Sost	β-catenin	Bglap
Vehicle	2.8326	0.0412442	3.16711	5.02653
	2.74245	0.438144	2.77896	4.15454
	6.09193	0.163757	1.38185	6.88547
	8.83712	0.6	2.1061	5.76481
			3.53395
M1	0.0448398	1.75095	0.256477	2.69326
	0.0278178	0.477291	1.14348	2.85915
	1.68497	0.85	1.06327	1.33139
	2.1	1.01	1.44205	2.16692
			2.12221
