# Supplementary material for: Connexin hemichannels with prostaglandin release in anabolic function of bone to mechanical loading
Source: eLife. 2022 Feb 8;11:e74365. doi: 10.7554/eLife.74365 (PMC8824479; doi:10.7554/eLife.74365)
Supplement: Figure 8—figure supplement 1—source data 1. [file elife-74365-fig8-figsupp1-data1.xlsx]

## Sheet: Sheet1
PBS	27.4	25.5	24.4	26.4	24.2	27	27.5	25
M1	27	25.1	24.9	23.5	27.2	27.6	26.4	26
PBS+PGE2	26.9	25.4	24.8	25.9	24.1	26.7	27	27.5
M1+PGE2	26.6	24.9	25.3	23.5	25.7	26.2	27	27.6
