# Supplementary material for: Connexin hemichannels with prostaglandin release in anabolic function of bone to mechanical loading
Source: eLife. 2022 Feb 8;11:e74365. doi: 10.7554/eLife.74365 (PMC8824479; doi:10.7554/eLife.74365)
Supplement: Figure 8—figure supplement 2—source data 1. [file elife-74365-fig8-figsupp2-data1.xlsx]

## Sheet: Sheet1
	BV/TV	Tb.N	Tb.Sp	Tb.Th	BMD	SMI
Vehicle+Control	16.2733	3.14288	0.174893	0.0517781	0.224649	1.95472
	16.8982	3.20877	0.173173	0.0526626	0.229322	1.96679
	13.7632	2.67906	0.186956	0.0513733	0.192289	2.06089
	15.6357	3.34934	0.171333	0.0466829	0.211826	1.82661
	13.7332	2.77115	0.190104	0.0495577	0.205664	2.13618
	14.6085	3.19801	0.186142	0.04568	0.204318	1.74976
	18.835	3.56591	0.176453	0.0528196	0.253601	1.78058
	11.8619	2.47189	0.177554	0.047987	0.186075	2.42151
M1+Control	15.4325	3.13024	0.160861	0.0493014	0.218902	2.30899
	13.5757	2.62886	0.17834	0.0516408	0.201907	2.26377
	10.3879	1.94762	0.214129	0.0533362	0.165889	2.45526
	13.4593	2.61816	0.183679	0.0514075	0.202622	2.26913
	13.0201	2.70297	0.17914	0.0481697	0.193156	2.33121
	14.3114	2.55056	0.242182	0.0561108	0.203458	1.95317
	18.9462	3.51938	0.175958	0.0538338	0.25721	1.78286
	13.8441	2.9235	0.19429	0.0473544	0.203147	1.94672
Vehicle+PGE2	17.0656	3.18067	0.167	0.053654	0.228352	2.16857
	16.8692	3.26746	0.151913	0.0516277	0.22394	2.29104
	13.4486	2.70958	0.184565	0.0496336	0.17897	2.09113
	10.6871	2.2416	0.197701	0.0476763	0.168049	2.33929
	17.5555	3.16891	0.184676	0.055399	0.245083	1.85808
	16.6305	3.42633	0.154436	0.0485373	0.233738	2.17144
	13.0774	2.64103	0.189946	0.0495165	0.199487	2.15604
	21.8132	4.13985	0.147836	0.0526909	0.28427	1.91596
M1+PGE2	21.0897	3.68327	0.145196	0.0572579	0.276207	2.18228
	12.305	2.60008	0.180204	0.0473255	0.184643	2.28854
	12.3474	2.46326	0.205731	0.0501262	0.178271	2.13504
	11.8319	2.31358	0.193295	0.0511409	0.183094	2.30313
	11.677	2.40316	0.190444	0.0485901	0.188425	2.38773
	13.7359	2.97514	0.184568	0.0461691	0.183348	1.91494
	15.1956	3.17819	0.179166	0.047812	0.223183	2.12601
	17.7769	3.06622	0.197438	0.0579764	0.254748	2.07831
