# Supplementary material for: Connexin hemichannels with prostaglandin release in anabolic function of bone to mechanical loading
Source: eLife. 2022 Feb 8;11:e74365. doi: 10.7554/eLife.74365 (PMC8824479; doi:10.7554/eLife.74365)
Supplement: Figure 8—source data 1. [file elife-74365-fig8-data1.xlsx]

## Sheet: Sheet1
	T.Ar	B.Ar	B.Ar/T.Ar	M.Ar	Ct.Th	BMD	pMOI
Vehicle+Control	1.05831	0.724254	68.4346	0.312888	0.231185	1.4054	0.165295
	1.03369	0.720801	68.7745	0.293819	0.234081	1.40493	0.158952
	0.980834	0.646192	65.8819	0.334642	0.210995	1.42003	0.140477
	1.01966	0.660608	64.7871	0.359052	0.211231	1.42194	0.14937
	0.923599	0.616146	66.7115	0.307452	0.21202	1.4223	0.123121
	1.00792	0.671525	66.6249	0.336394	0.208485	1.38226	0.148773
	1.13112	0.722395	63.8654	0.340873	0.208669	1.35394	0.180549
	1.00562	0.681692	65.8194	0.323929	0.21579	1.3808	0.145481
M1+Control	1.09999	0.706117	64.1929	0.393876	0.214701	1.40044	0.177262
	0.997695	0.638914	64.0391	0.35878	0.200427	1.39664	0.142036
	0.998969	0.648954	64.9624	0.350015	0.209976	1.4271	0.142597
	0.909678	0.558907	61.4401	0.350771	0.185813	1.38979	0.116878
	0.949732	0.61568	64.8267	0.334052	0.203366	1.43122	0.129951
	1.42707	0.657551	60.0916	0.569522	0.212214	1.3467	0.142597
	1.11699	0.712681	63.8038	0.404308	0.218138	1.41773	0.177259
	1.07458	0.672141	62.5494	0.402435	0.208388	1.43112	0.161796
Vehicle+PGE2	0.933296	0.624447	66.9078	0.308849	0.212737	1.41378	0.127124
	0.873465	0.610102	69.8485	0.263363	0.214491	1.39572	0.112986
	0.891467	0.586983	64.6251	0.321307	0.204193	1.39431	0.11631
	0.837442	0.673454	68.4768	0.263989	0.2088	1.4181	0.102881
	0.802279	0.537498	66.9964	0.264781	0.196989	1.41286	0.0939393
	0.990626	0.667624	67.3942	0.323001	0.221106	1.42107	0.144057
	1.08253	0.725386	66.2983	0.357141	0.226067	1.38411	0.169128
	0.93086	0.588909	63.2651	0.34195	0.198544	1.41749	0.12249
M1+PGE2	0.91756	0.619962	67.5663	0.297598	0.208555	1.34926	0.121779
	0.901265	0.599035	66.466	0.30223	0.205751	1.43801	0.118613
	1.03917	0.694785	66.8593	0.34439	0.224954	1.39313	0.154802
	0.848774	0.573595	67.5793	0.275179	0.205555	1.43285	0.105428
	0.817124	0.563478	68.9587	0.253646	0.206728	1.41598	0.0984338
	0.935867	0.61205	65.3992	0.323817	0.208639	1.42098	0.124826
	0.90044	0.638036	70.8583	0.262404	0.215892	1.38908	0.120495
	1.21262	0.782487	64.5288	0.374123	0.226628	1.3977	0.208346
